# Supplementary material for: Sea Storm Analysis: Evaluation of Multiannual Wave Parameters Retrieved from HF Radar and Wave Model
Source: MDPI journal article supplement (doi:10.3390/rs14071696), 2022-03-31

## Supplementary Materials

**Table S1.** HFr retrieval along the RC3, RC5, RC7 at SORR, CAST and PORT from May 2008 to December 2012.

| RCs | Year | SORR | CAST | PORT | TOTAL DATA |
|-----|------|------|------|------|------------|
| RC3 | 2008 | 967  | 269  | 795  | 5880       |
| RC5 |      | 1590 | 694  | 705  |            |
| RC7 |      | 1742 | 728  | 580  |            |
| RC3 | 2009 | 1368 | 451  | 1079 | 8760       |
| RC5 |      | 2553 | 1301 | 936  |            |
| RC7 |      | 2712 | 1458 | 756  |            |
| RC3 | 2010 | 2556 | 576  | 1471 | 8760       |
| RC5 |      | 2556 | 1888 | 1342 |            |
| RC7 |      | 2703 | 2450 | 1040 |            |
| RC3 | 2011 | 847  | 139  | 596  | 8760       |
| RC5 |      | 1464 | 742  | 335  |            |
| RC7 |      | 1586 | 800  | 283  |            |
| RC3 | 2012 | 1372 | 498  | 1820 | 8784       |
| RC5 |      | 2393 | 1416 | 1298 |            |
| RC7 |      | 2457 | 1599 | 1017 |            |

**Table S2.** List of the sea storm events retrieved along the RC3, RC5, RC7 at SORR, CAST and PORT from May 2008 to December 2012. In the table are reported the start date and end date of events, duration (h), Energy content (m2h), Class storm, Wind Direction from ISPRA weather station (°N), Mean Wave Direction from MWM (°N) and Directional Spreading Deviation.

| RC | Site | Start date       | End date         | Duration<br>(h) | Energy<br>content<br>(m <sup>2</sup> h) | Class<br>storm    | WD<br>(°N)  | MWD<br>(°N) | DSD |
|----|------|------------------|------------------|-----------------|-----------------------------------------|-------------------|-------------|-------------|-----|
| 3  | SORR | 19/05/2008 21:00 | 22/05/2008 23:00 | 74              | 397,30II                                | 203,27242,0832,92 |             |             |     |
| 3  | PORT | 20/05/2008 19:00 | 21/05/2008 11:00 | 16              | 114,78I                                 | 201,059           | 222,7829,28 |             |     |
| 3  | CAST | 20/05/2008 18:00 | 21/05/2008 22:00 | 28              | 79,11 I                                 | 193,48245,6418,82 |             |             |     |
| 3  | SORR | 04/06/2008 00:00 | 05/06/2008 23:00 | 47              | 176,30I                                 | 186,29263,6126,80 |             |             |     |
| 3  | SORR | 23/07/2008 13:00 | 23/07/2008 23:00 | 10              | 35,30 I                                 | 227,64281,9226,99 |             |             |     |
| 3  | SORR | 24/07/2008 16:00 | 24/07/2008 23:00 | 7               | 32,49 I                                 | 235               | 281,9225,82 |             |     |
| 3  | SORR | 13/09/2008 08:00 | 13/09/2008 23:00 | 15              | 52,66 I                                 | 234,06248,4735,04 |             |             |     |
| 3  | SORR | 03/10/2008 00:00 | 04/10/2008 11:00 | 35              | 152,06I                                 | 201,06264,0226,27 |             |             |     |

---

|   |                       |                  |    |           |                   |
|---|-----------------------|------------------|----|-----------|-------------------|
| 3 | SORR 29/10/2008 23:00 | 30/10/2008 23:00 | 24 | 203,74I   | 220,28227,2629,89 |
| 3 | SORR 01/11/2008 03:00 | 01/11/2008 23:00 | 20 | 89,06 I   | 197,38227,2633,12 |
| 3 | PORT 30/10/2008 08:00 | 31/10/2008 03:00 | 19 | 39,26 I   | 217,85218,7549,24 |
| 3 | SORR 21/11/2008 01:00 | 21/11/2008 23:00 | 22 | 208,19I   | 239,61232,7228,40 |
| 3 | SORR 24/11/2008 12:00 | 25/11/2008 14:00 | 26 | 137,70I   | 178,44232,7235,63 |
| 3 | SORR 28/11/2008 07:00 | 29/11/2008 23:00 | 40 | 302,71II  | 191,34232,7229    |
| 3 | PORT 21/11/2008 18:00 | 22/11/2008 21:00 | 27 | 73,45 I   | 171 224,2727,62   |
| 3 | PORT 24/11/2008 16:00 | 24/11/2008 23:00 | 7  | 35,97 I   | 193,25224,2719,85 |
| 3 | PORT 28/11/2008 09:00 | 30/11/2008 11:00 | 50 | 205,21I   | 192,74224,2727,27 |
| 3 | SORR 01/12/2008 00:00 | 02/12/2008 09:00 | 33 | 184,49I   | 190,41236,5231,15 |
| 3 | SORR 04/12/2008 15:00 | 06/12/2008 23:00 | 56 | 523,38III | 226,54236,5231,11 |
| 3 | PORT 01/12/2008 06:00 | 02/12/2008 07:00 | 25 | 85,56 I   | 193,19228,8525,19 |
| 3 | PORT 05/12/2008 01:00 | 06/12/2008 11:00 | 34 | 161,77I   | 212,57228,8542,36 |
| 3 | CAST 05/12/2008 06:00 | 07/12/2008 01:00 | 43 | 159,02I   | 223,57253,6321,10 |
| 3 | SORR 12/12/2008 01:00 | 12/12/2008 23:00 | 22 | 178,11I   | 204,61232,0228,64 |
| 3 | SORR 13/12/2008 15:00 | 13/12/2008 23:00 | 8  | 29,73 I   | 122 232,0228,07   |
| 3 | PORT 11/12/2008 00:00 | 11/12/2008 12:00 | 12 | 48,50 I   | 201,46212,2523,54 |
| 3 | PORT 12/12/2008 11:00 | 13/12/2008 12:00 | 25 | 58,96 I   | 209,04212,2540,29 |
| 3 | PORT 15/12/2008 20:00 | 16/12/2008 11:00 | 15 | 40,04 I   | 132,69212,2522,53 |
| 3 | CAST 13/12/2008 00:00 | 13/12/2008 18:00 | 18 | 35,56 I   | 193,10243,9316,56 |
| 3 | SORR 01/01/2009 12:00 | 01/01/2009 23:00 | 11 | 85,93 I   | 210,17233,0931,88 |
| 3 | SORR 02/01/2009 21:00 | 03/01/2009 10:00 | 13 | 80,11 I   | 160,36233,0933,31 |
| 3 | PORT 01/01/2009 12:00 | 02/01/2009 02:00 | 14 | 32,29 I   | 210,6 223,7030,32 |
| 3 | SORR 14/01/2009 12:00 | 15/01/2009 07:00 | 19 | 98,66 I   | 185,5 203,6729,55 |
| 3 | SORR 04/02/2009 03:00 | 04/02/2009 20:00 | 17 | 95,44 I   | 225,94246,9329,55 |

---

|   |                       |                  |    |          |                   |             |
|---|-----------------------|------------------|----|----------|-------------------|-------------|
| 3 | SORR 06/02/2009 15:00 | 07/02/2009 02:00 | 11 | 69,19 I  | 174               | 246,9332,20 |
| 3 | SORR 07/02/2009 09:00 | 09/02/2009 23:00 | 62 | 316,50II | 192,95246,9328,81 |             |
| 3 | SORR 10/02/2009 12:00 | 11/02/2009 22:00 | 34 | 359,71II | 244,8             | 246,9325,77 |
| 3 | PORT 10/02/2009 22:00 | 12/02/2009 09:00 | 35 | 67,31 I  | 240,78228,7233,75 |             |
| 3 | SORR 05/03/2009 12:00 | 05/03/2009 23:00 | 11 | 176,27I  | 232,25252,1031,75 |             |
| 3 | SORR 08/03/2009 13:00 | 09/03/2009 23:00 | 34 | 144,40I  | 211,086           | 252,1025,54 |
| 3 | PORT 05/03/2009 03:00 | 06/03/2009 07:00 | 28 | 126,72I  | 197,79225,3132,12 |             |
| 3 | SORR 23/03/2009 14:00 | 25/03/2009 23:00 | 57 | 333,89II | 218,14262,8727,06 |             |
| 3 | SORR 28/04/2009 03:00 | 30/04/2009 11:00 | 56 | 330,72II | 215,03256,9028,15 |             |
| 3 | SORR 01/05/2009 12:00 | 01/05/2009 23:00 | 11 | 28,48 I  | 168,33256,9027,60 |             |
| 3 | CAST 28/04/2009 07:00 | 29/04/2009 01:00 | 18 | 58,77 I  | 220,79255,0818,17 |             |
| 3 | CAST 29/04/2009 16:00 | 30/04/2009 16:00 | 24 | 68,18 I  | 207,4             | 255,0820,38 |
| 3 | PORT 28/04/2009 12:00 | 28/04/2009 22:00 | 10 | 27,86 I  | 211,09232,4422,24 |             |
| 3 | SORR 01/06/2009 19:00 | 02/06/2009 11:00 | 16 | 139,38I  | 227,71256,9228,85 |             |
| 3 | SORR 21/06/2009 07:00 | 21/06/2009 23:00 | 16 | 90,45 I  | 187,18256,0926,49 |             |
| 3 | SORR 12/10/2009 12:00 | 12/10/2009 23:00 | 11 | 115,96I  | 192,42253,3930,94 |             |
| 3 | SORR 03/11/2009 00:00 | 03/11/2009 23:00 | 23 | 209,78I  | 249,96252,3625,73 |             |
| 3 | SORR 04/11/2009 20:00 | 05/11/2009 15:00 | 19 | 115,62I  | 225,5             | 252,3632,12 |
| 3 | SORR 08/11/2009 07:00 | 09/11/2009 11:00 | 28 | 198,11I  | 171,31252,3632,09 |             |
| 3 | CAST 08/11/2009 08:00 | 08/11/2009 19:00 | 11 | 40,34 I  | 216,08252,2620,11 |             |
| 3 | PORT 08/11/2009 06:00 | 09/11/2009 15:00 | 33 | 71,67 I  | 163,5             | 226,9430,85 |
| 3 | SORR 28/11/2009 09:00 | 28/11/2009 23:00 | 14 | 50,69 I  | 132,18232,7135,75 |             |
| 3 | SORR 01/12/2009 00:00 | 01/12/2009 16:00 | 16 | 96,44 I  | 212,82259,6437,24 |             |
| 3 | SORR 08/12/2009 13:00 | 09/12/2009 18:00 | 29 | 109,36I  | 154,67259,6436,47 |             |
| 3 | PORT 05/12/2009 01:00 | 05/12/2009 11:00 | 10 | 29,25 I  | 135,36234,0742,24 |             |

---

|   |                       |                  |    |             |                   |
|---|-----------------------|------------------|----|-------------|-------------------|
| 3 | SORR 16/12/2009 12:00 | 17/12/2009 11:00 | 23 | 135,40I     | 182,04257,4123,39 |
| 3 | SORR 27/12/2009 00:00 | 29/12/2009 05:00 | 53 | 427,73II    | 182,04254,8027,87 |
| 3 | SORR 01/01/2010 00:00 | 03/01/2010 11:00 | 59 | 875,54IV    | 242,88248,5227,35 |
| 3 | SORR 05/01/2010 22:00 | 07/01/2010 11:00 | 37 | 282,54II    | 206,84248,5232,91 |
| 3 | SORR 10/01/2010 08:00 | 10/01/2010 23:00 | 15 | 184,07I     | 222,19248,5228,67 |
| 3 | CAST 01/01/2010 04:00 | 01/01/2010 11:00 | 7  | 28,40 I     | 237,62249,5521,24 |
| 3 | PORT 01/01/2010 06:00 | 01/01/2010 23:00 | 17 | 67,29 I     | 241,78226,0253,54 |
| 3 | PORT 09/01/2010 03:00 | 10/01/2010 23:00 | 44 | 128,93I     | 182,76226,0239,22 |
| 3 | SORR 01/02/2010 00:00 | 01/02/2010 17:00 | 17 | 89,53 I     | 125,61251,1543,14 |
| 3 | SORR 03/02/2010 13:00 | 03/02/2010 23:00 | 10 | 25,30 I     | 180,25251,1525,21 |
| 3 | SORR 05/02/2010 17:00 | 06/02/2010 23:00 | 30 | 393,85II    | 219,71251,1527,72 |
| 3 | SORR 10/02/2010 13:00 | 11/02/2010 22:00 | 33 | 364,49II    | 230,65251,1527,20 |
| 3 | SORR 04/03/2010 05:00 | 06/03/2010 08:00 | 51 | 434,47II    | 213,33184,6735,12 |
| 3 | SORR 07/03/2010 16:00 | 08/03/2010 11:00 | 19 | 77,89 I     | 27,65 184,6741,31 |
| 3 | SORR 10/03/2010 15:00 | 10/03/2010 23:00 | 8  | 55,27 I     | 246,22184,6732,88 |
| 3 | PORT 11/03/2010 05:00 | 11/03/2010 22:00 | 17 | 33,11 I     | 207,89218,5945,67 |
| 3 | SORR 31/03/2010 00:00 | 31/03/2010 11:00 | 11 | 55,84 I     | 245,67263,9437,52 |
| 3 | SORR 01/04/2010 12:00 | 03/04/2010 17:00 | 53 | 147,82I     | 169,09263,9428,50 |
| 3 | SORR 05/04/2010 00:00 | 06/04/2010 22:00 | 46 | 337,69II    | 223,79263,9431,65 |
| 3 | SORR 19/04/2010 07:00 | 21/04/2010 11:00 | 52 | 255,05II    | 181,92270,8124,94 |
| 3 | SORR 05/05/2010 17:00 | 08/05/2010 23:00 | 78 | 365,04II    | 209,42245,0429,67 |
| 3 | SORR 13/05/2010 12:00 | 14/05/2010 16:00 | 28 | 62,16 I     | 185,89249,7531,84 |
| 3 | SORR 15/05/2010 02:00 | 18/05/2010 23:00 | 93 | 1,01E+03 IV | 209,97249,7526,73 |
| 3 | CAST 16/05/2010 13:00 | 17/05/2010 16:00 | 27 | 141 I       | 227,5 251,0815,08 |
| 3 | SORR 30/05/2010 16:00 | 31/05/2010 11:00 | 19 | 138,13I     | 197,15260,9828,22 |

---

|   |                       |                  |     |           |                   |
|---|-----------------------|------------------|-----|-----------|-------------------|
| 3 | SORR 03/06/2010 08:00 | 03/06/2010 23:00 | 15  | 37,47 I   | 201,19257,7926,51 |
| 3 | SORR 18/06/2010 19:00 | 21/06/2010 11:00 | 64  | 436,08II  | 195,11265,1927,73 |
| 3 | SORR 22/06/2010 05:00 | 22/06/2010 17:00 | 12  | 64,08 I   | 155,23265,1934,13 |
| 3 | SORR 24/06/2010 12:00 | 25/06/2010 11:00 | 23  | 51,77 I   | 141,25265,1923,81 |
| 3 | SORR 24/07/2010 06:00 | 25/07/2010 07:00 | 25  | 179,96I   | 181,54272,3526,28 |
| 3 | SORR 28/08/2010 16:00 | 29/08/2010 11:00 | 19  | 71,28 I   | 172,2 264,4620,49 |
| 3 | SORR 30/08/2010 12:00 | 30/08/2010 23:00 | 11  | 65,56 I   | 250,67264,4624,12 |
| 3 | SORR 25/09/2010 09:00 | 28/09/2010 16:00 | 79  | 566,44III | 199,62264,4424,14 |
| 3 | CAST 26/09/2010 04:00 | 27/09/2010 01:00 | 21  | 84,87 I   | 231,5 258,6917,57 |
| 3 | SORR 14/10/2010 15:00 | 16/10/2010 11:00 | 44  | 192,93I   | 128,98241,1124,67 |
| 3 | SORR 17/10/2010 04:00 | 17/10/2010 11:00 | 7   | 39,98 I   | 164,87241,1129,86 |
| 3 | SORR 08/11/2010 03:00 | 09/11/2010 11:00 | 32  | 597,82III | 216,79228,0636,44 |
| 3 | CAST 09/11/2010 08:00 | 09/11/2010 23:00 | 15  | 53,67 I   | 209,81244,5718,46 |
| 3 | PORT 08/11/2010 07:00 | 10/11/2010 23:00 | 64  | 271,05II  | 211,74223,6132,60 |
| 3 | SORR 18/11/2010 09:00 | 19/11/2010 11:00 | 26  | 218,86I   | 177,48241,2933,02 |
| 3 | SORR 21/11/2010 20:00 | 23/11/2010 23:00 | 51  | 589 III   | 202,54241,2928,74 |
| 3 | PORT 23/11/2010 18:00 | 24/11/2010 15:00 | 21  | 45,20 I   | 243,32228,2424,57 |
| 3 | SORR 01/12/2010 09:00 | 05/12/2010 17:00 | 104 | 939,87IV  | 179,84247,6227,83 |
| 3 | PORT 01/12/2010 16:00 | 03/12/2010 14:00 | 46  | 95,41 I   | 215,96226,2251,21 |
| 3 | SORR 15/12/2010 13:00 | 16/12/2010 11:00 | 22  | 47,14 I   | 56,70 163,0446,03 |
| 3 | SORR 17/12/2010 19:00 | 18/12/2010 23:00 | 28  | 581,12III | 234,65163,0430,25 |
| 3 | PORT 17/12/2010 17:00 | 18/12/2010 11:00 | 18  | 99,48 I   | 238,26231,4944,26 |
| 3 | SORR 24/12/2010 04:00 | 26/12/2010 18:00 | 62  | 589,89III | 184,84225,1228,70 |
| 3 | PORT 25/12/2010 02:00 | 25/12/2010 22:00 | 20  | 42,51 I   | 221,52220,3549,88 |
| 3 | SORR 16/02/2011 14:00 | 16/02/2011 23:00 | 9   | 82,73 I   | 204,3 130,5134,32 |

---

|   |                       |                  |    |        |     |                   |
|---|-----------------------|------------------|----|--------|-----|-------------------|
| 3 | PORT 16/02/2011 09:00 | 17/02/2011 07:00 | 22 | 65,13  | I   | 195,35223,6824,66 |
| 3 | SORR 03/05/2011 13:00 | 03/05/2011 23:00 | 10 | 34,23  | I   | 218,26248,6238,02 |
| 3 | SORR 01/06/2011 21:00 | 02/06/2011 06:00 | 9  | 103,65 | I   | 187,17255,9630,65 |
| 3 | SORR 03/12/2011 18:00 | 04/12/2011 23:00 | 29 | 135,40 | I   | 190,34241,3732,66 |
| 3 | SORR 05/01/2012 12:00 | 05/01/2012 23:00 | 11 | 101,68 | I   | 234,40267,2224,61 |
| 3 | SORR 06/01/2012 18:00 | 07/01/2012 10:00 | 16 | 42,48  | I   | 184,86267,2236,25 |
| 3 | SORR 07/04/2012 13:00 | 08/04/2012 23:00 | 34 | 214,07 | I   | 199,25253,1727,78 |
| 3 | SORR 11/04/2012 16:00 | 11/04/2012 23:00 | 7  | 38,62  | I   | 244,10253,1732,72 |
| 3 | SORR 14/04/2012 08:00 | 15/04/2012 11:00 | 27 | 312,23 | II  | 239,45253,1726,10 |
| 3 | SORR 18/04/2012 09:00 | 21/04/2012 11:00 | 74 | 547    | III | 214,75253,1729,49 |
| 3 | SORR 25/04/2012 00:00 | 25/04/2012 14:00 | 14 | 67,75  | I   | 234,56253,1724,30 |
| 3 | PORT 08/04/2012 16:00 | 09/04/2012 11:00 | 19 | 60,52  | I   | 72,94 231,7 29,31 |
| 3 | SORR 07/05/2012 00:00 | 08/05/2012 23:00 | 47 | 186,40 | I   | 187,44249,8928,59 |
| 3 | SORR 21/05/2012 12:00 | 24/05/2012 11:00 | 71 | 272,77 | II  | 182,30245,6028,92 |
| 3 | PORT 22/05/2012 06:00 | 23/05/2012 10:00 | 28 | 64,86  | I   | 154,44231,5533,50 |
| 3 | SORR 05/06/2012 04:00 | 05/06/2012 23:00 | 19 | 77,65  | I   | 172,61266,3720,46 |
| 3 | SORR 01/09/2012 00:00 | 01/09/2012 14:00 | 14 | 52,58  | I   | 295,42251,7519,52 |
| 3 | SORR 06/09/2012 02:00 | 06/09/2012 11:00 | 9  | 63,78  | I   | 256,65251,7525,59 |
| 3 | PORT 04/09/2012 12:00 | 05/09/2012 04:00 | 16 | 38,99  | I   | 141,12226,2530,63 |
| 3 | SORR 02/10/2012 12:00 | 03/10/2012 23:00 | 35 | 142,52 | I   | 220,93266,3620,91 |
| 3 | SORR 09/10/2012 12:00 | 09/10/2012 23:00 | 11 | 33,27  | I   | 193,01259,9427,12 |
| 3 | SORR 16/10/2012 00:00 | 17/10/2012 00:00 | 24 | 167,42 | I   | 222,27254,3629,97 |
| 3 | SORR 27/10/2012 06:00 | 29/10/2012 23:00 | 65 | 811,73 | IV  | 226,29243,4830,99 |
| 3 | PORT 26/10/2012 20:00 | 27/10/2012 23:00 | 27 | 72,99  | I   | 208,18220,3925,43 |
| 3 | PORT 29/10/2012 07:00 | 29/10/2012 23:00 | 16 | 57,16  | I   | 151,99220,3936,32 |

---

|   |                       |                  |    |           |       |                   |
|---|-----------------------|------------------|----|-----------|-------|-------------------|
| 3 | SORR 28/11/2012 13:00 | 30/11/2012 11:00 | 46 | 1,07E+03  | IV    | 209,17234,0332,17 |
| 3 | CAST 28/11/2012 22:00 | 29/11/2012 23:00 | 25 | 107,06I   |       | 206,77244,7219,45 |
| 3 | PORT 28/11/2012 08:00 | 30/11/2012 16:00 | 56 | 323,11II  |       | 197,11214,2829,24 |
| 3 | SORR 14/12/2012 19:00 | 16/12/2012 12:00 | 41 | 147,31I   | NaN   | 251,8934,61       |
| 3 | SORR 17/12/2012 08:00 | 19/12/2012 11:00 | 51 | 256,63II  |       | 105,24251,8926,60 |
| 3 | CAST 17/12/2012 17:00 | 17/12/2012 23:00 | 6  | 64,57 I   | 80,11 | 249,0414,42       |
| 3 | SORR 27/12/2012 11:00 | 27/12/2012 23:00 | 12 | 36,65 I   |       | 276,96265,2726,09 |
| 5 | SORR 20/05/2008 02:00 | 22/05/2008 23:00 | 69 | 670,16III |       | 201,97235,1331,81 |
| 5 | PORT 20/05/2008 07:00 | 21/05/2008 11:00 | 28 | 261,03II  |       | 197,03224,8736,38 |
| 5 | CAST 19/05/2008 22:00 | 22/05/2008 20:00 | 70 | 274,92II  |       | 201,65244,8220,03 |
| 5 | SORR 03/06/2008 22:00 | 05/06/2008 23:00 | 49 | 217,36I   |       | 188,24262,3326,87 |
| 5 | SORR 06/06/2008 13:00 | 08/06/2008 23:00 | 58 | 160,75I   |       | 187,58262,3326,46 |
| 5 | CAST 04/06/2008 09:00 | 05/06/2008 23:00 | 38 | 116,08I   |       | 211,13258,7019,62 |
| 5 | SORR 22/07/2008 11:00 | 22/07/2008 22:00 | 11 | 40 I      | 96,5  | 281,0635,78       |
| 5 | SORR 23/07/2008 12:00 | 24/07/2008 23:00 | 35 | 148,40I   |       | 190,97281,0626,61 |
| 5 | SORR 13/09/2008 07:00 | 13/09/2008 23:00 | 16 | 71,48 I   |       | 232,18249,0535,43 |
| 5 | SORR 15/09/2008 11:00 | 16/09/2008 11:00 | 24 | 62,59 I   |       | 186,44249,0532,14 |
| 5 | SORR 03/10/2008 00:00 | 05/10/2008 18:00 | 66 | 320,99II  |       | 197,18267,7225,85 |
| 5 | CAST 04/10/2008 00:00 | 04/10/2008 11:00 | 11 | 83,41 I   |       | 237,42262,6422,52 |
| 5 | SORR 29/10/2008 21:00 | 31/10/2008 07:00 | 34 | 324,89II  |       | 212,77226,4430,15 |
| 5 | SORR 01/11/2008 02:00 | 01/11/2008 23:00 | 21 | 135,83I   |       | 197,68226,4432,58 |
| 5 | PORT 29/10/2008 12:00 | 31/10/2008 05:00 | 41 | 96,91 I   |       | 202,79222,1836,95 |
| 5 | CAST 30/10/2008 00:00 | 30/10/2008 11:00 | 11 | 41,60 I   |       | 219,08237,4321,38 |
| 5 | SORR 21/11/2008 00:00 | 21/11/2008 23:00 | 23 | 240,27I   | 243   | 232,4228,52       |
| 5 | SORR 24/11/2008 12:00 | 26/11/2008 04:00 | 40 | 346,48II  |       | 169,63232,4236,22 |

---

|   |                       |                  |    |           |                      |
|---|-----------------------|------------------|----|-----------|----------------------|
| 5 | SORR 28/11/2008 09:00 | 30/11/2008 23:00 | 62 | 622,92III | 188,95232,4232,14    |
| 5 | PORT 21/11/2008 18:00 | 22/11/2008 21:00 | 27 | 89,68 I   | 171 224,1227,62      |
| 5 | PORT 24/11/2008 16:00 | 25/11/2008 13:00 | 21 | 115,86I   | 183,77224,1229,35    |
| 5 | PORT 28/11/2008 09:00 | 30/11/2008 23:00 | 62 | 273,88II  | 188,95224,1226,81    |
| 5 | SORR 01/12/2008 00:00 | 02/12/2008 11:00 | 35 | 337,88II  | 184,67229,6330,88    |
| 5 | SORR 04/12/2008 14:00 | 07/12/2008 23:00 | 81 | 1,18E+03  | IV 200,80229,6329,38 |
| 5 | SORR 08/12/2008 13:00 | 08/12/2008 21:00 | 8  | 26,89 I   | 91,44 229,6342,16    |
| 5 | CAST 04/12/2008 16:00 | 07/12/2008 11:00 | 67 | 265,80II  | 204,91253,6520,84    |
| 5 | PORT 01/12/2008 00:00 | 02/12/2008 07:00 | 31 | 128,59I   | 191,12232,0625,59    |
| 5 | PORT 05/12/2008 01:00 | 05/12/2008 22:00 | 21 | 102,39I   | 203,41232,0643,56    |
| 5 | SORR 12/12/2008 00:00 | 13/12/2008 23:00 | 47 | 330,53II  | 192,06215,1626,94    |
| 5 | SORR 15/12/2008 12:00 | 17/12/2008 11:00 | 47 | 103,33I   | 112,43215,1628,34    |
| 5 | CAST 12/12/2008 16:00 | 13/12/2008 23:00 | 31 | 87,74 I   | 182,03245,5216,93    |
| 5 | PORT 11/12/2008 00:00 | 11/12/2008 15:00 | 15 | 83,53 I   | 188,12212,6723,27    |
| 5 | PORT 12/12/2008 01:00 | 13/12/2008 14:00 | 37 | 91,63 I   | 204,68212,6734,95    |
| 5 | PORT 15/12/2008 07:00 | 16/12/2008 15:00 | 32 | 105,79I   | 143,51212,6724,23    |
| 5 | SORR 27/12/2008 00:00 | 27/12/2008 11:00 | 11 | 25,46 I   | 18,33 67,93 39,80    |
| 5 | SORR 01/01/2009 09:00 | 01/01/2009 23:00 | 14 | 119,21I   | 207,8 230,6331,63    |
| 5 | SORR 02/01/2009 21:00 | 03/01/2009 11:00 | 14 | 120,90I   | 150,73 34,79         |
| 5 | CAST 01/01/2009 13:00 | 02/01/2009 04:00 | 15 | 42,22 I   | 207,44240,4319,55    |
| 5 | PORT 01/01/2009 13:00 | 02/01/2009 09:00 | 20 | 46,77 I   | 242,29224,8330,29    |
| 5 | SORR 14/01/2009 10:00 | 15/01/2009 11:00 | 25 | 143,04I   | 177,54203,2429,55    |
| 5 | SORR 04/02/2009 02:00 | 05/02/2009 11:00 | 33 | 158,33I   | 204 242,8629,07      |
| 5 | SORR 07/02/2009 09:00 | 09/02/2009 23:00 | 62 | 420,31II  | 192,95242,8628,81    |
| 5 | SORR 10/02/2009 12:00 | 11/02/2009 23:00 | 35 | 402,45II  | 247,94242,8625,87    |



---

|   |                       |                  |    |           |                   |
|---|-----------------------|------------------|----|-----------|-------------------|
| 5 | CAST 10/02/2009 13:00 | 11/02/2009 11:00 | 22 | 90,15 I   | 234,61244,0520,06 |
| 5 | PORT 03/02/2009 00:00 | 03/02/2009 11:00 | 11 | 67,34 I   | 144,33223,6624,84 |
| 5 | PORT 07/02/2009 02:00 | 07/02/2009 13:00 | 11 | 34,15 I   | 154,67223,6626,19 |
| 5 | SORR 05/03/2009 03:00 | 05/03/2009 23:00 | 20 | 395,24II  | 219 256,3933,33   |
| 5 | SORR 07/03/2009 01:00 | 07/03/2009 18:00 | 17 | 37,26 I   | 113 256,3944,10   |
| 5 | SORR 08/03/2009 12:00 | 10/03/2009 05:00 | 41 | 203,51I   | 207 256,3927,30   |
| 5 | SORR 10/03/2009 12:00 | 10/03/2009 23:00 | 11 | 25,74 I   | 200,58256,3934,41 |
| 5 | SORR 11/03/2009 12:00 | 12/03/2009 11:00 | 23 | 55,27 I   | 96,12 256,3940,37 |
| 5 | CAST 11/03/2009 01:00 | 11/03/2009 11:00 | 10 | 52,08 I   | 192,27252,8222,15 |
| 5 | PORT 05/03/2009 07:00 | 05/03/2009 23:00 | 16 | 113,65I   | 226,82219,7236,92 |
| 5 | SORR 23/03/2009 15:00 | 26/03/2009 21:00 | 78 | 576,72III | 214,25257,7926,31 |
| 5 | CAST 24/03/2009 18:00 | 25/03/2009 11:00 | 17 | 100,80I   | 228,61255,1021,09 |
| 5 | SORR 28/04/2009 03:00 | 01/05/2009 20:00 | 89 | 575,70III | 177,6 259,5527,01 |
| 5 | CAST 28/04/2009 08:00 | 30/04/2009 21:00 | 61 | 305,77II  | 196,45254,3019,29 |
| 5 | SORR 01/06/2009 20:00 | 02/06/2009 11:00 | 15 | 167,42I   | 232,37259,0028,31 |
| 5 | SORR 03/06/2009 05:00 | 03/06/2009 23:00 | 18 | 50,33 I   | 201 259,0029,72   |
| 5 | CAST 03/06/2009 06:00 | 03/06/2009 22:00 | 16 | 40,05 I   | 218,35256,7419,37 |
| 5 | SORR 21/06/2009 06:00 | 22/06/2009 11:00 | 29 | 142,93I   | 164,87263,5733,14 |
| 5 | SORR 24/06/2009 13:00 | 26/06/2009 06:00 | 41 | 83,54 I   | 162,83263,5724,36 |
| 5 | SORR 03/08/2009 14:00 | 04/08/2009 23:00 | 33 | 92,28 I   | 179,65256,4929,51 |
| 5 | SORR 17/09/2009 19:00 | 18/09/2009 23:00 | 28 | 71,10 I   | 139,38268,0724,07 |
| 5 | SORR 12/10/2009 12:00 | 13/10/2009 11:00 | 23 | 169,09I   | 216,42248,5131,50 |
| 5 | SORR 03/11/2009 00:00 | 03/11/2009 23:00 | 23 | 244,74I   | 249,96248,6525,73 |
| 5 | SORR 05/11/2009 03:00 | 05/11/2009 11:00 | 8  | 67,14 I   | 232,44248,6531,44 |
| 5 | SORR 08/11/2009 06:00 | 09/11/2009 22:00 | 40 | 406,29II  | 162,34248,6533,49 |

---

|   |                       |                  |    |           |        |             |
|---|-----------------------|------------------|----|-----------|--------|-------------|
| 5 | SORR 11/11/2009 12:00 | 12/11/2009 10:00 | 22 | 78,63 I   | 89,09  | 248,6539,67 |
| 5 | CAST 03/11/2009 02:00 | 04/11/2009 03:00 | 25 | 100,61I   | 229,77 | 248,8420,54 |
| 5 | CAST 05/11/2009 00:00 | 05/11/2009 18:00 | 18 | 59,22 I   | 229,47 | 248,8419,42 |
| 5 | CAST 08/11/2009 08:00 | 09/11/2009 16:00 | 32 | 116,5 I   | 159,94 | 248,8421,42 |
| 5 | PORT 02/11/2009 20:00 | 03/11/2009 05:00 | 9  | 32,61 I   | 213,4  | 227,1726,61 |
| 5 | SORR 27/11/2009 06:00 | 28/11/2009 23:00 | 41 | 224,36I   | 165,97 | 229,5035,71 |
| 5 | SORR 30/11/2009 16:00 | 30/11/2009 23:00 | 7  | 54,45 I   | 194    | 229,5036,39 |
| 5 | CAST 28/11/2009 10:00 | 28/11/2009 23:00 | 13 | 29,88 I   | 124,2  | 242,9718,57 |
| 5 | PORT 29/11/2009 23:00 | 30/11/2009 11:00 | 12 | 40,79 I   | 153,38 | 212,3630,19 |
| 5 | SORR 01/12/2009 00:00 | 01/12/2009 17:00 | 17 | 118,22I   | 219    | 254,1037,00 |
| 5 | SORR 02/12/2009 16:00 | 03/12/2009 11:00 | 19 | 54,28 I   | 92,75  | 254,1032,10 |
| 5 | SORR 04/12/2009 12:00 | 04/12/2009 23:00 | 11 | 139,15I   | 184,83 | 254,1032,07 |
| 5 | SORR 06/12/2009 17:00 | 07/12/2009 08:00 | 15 | 26,48 I   | 53,94  | 254,1021,35 |
| 5 | SORR 08/12/2009 12:00 | 09/12/2009 11:00 | 23 | 134,74I   | 179,25 | 254,1034,97 |
| 5 | CAST 08/12/2009 16:00 | 08/12/2009 23:00 | 7  | 26,26 I   | 235,75 | 250,3119,85 |
| 5 | PORT 05/12/2009 01:00 | 05/12/2009 11:00 | 10 | 28,42 I   | 135,36 | 229,9342,24 |
| 5 | SORR 16/12/2009 11:00 | 17/12/2009 11:00 | 24 | 197,07I   | 188,4  | 236,4224,37 |
| 5 | CAST 16/12/2009 13:00 | 18/12/2009 19:00 | 54 | 200,87I   | 209,24 | 257,1517,94 |
| 5 | SORR 23/12/2009 05:00 | 23/12/2009 14:00 | 9  | 81,12 I   | 175,5  | 248,1936,12 |
| 5 | SORR 27/12/2009 00:00 | 29/12/2009 09:00 | 57 | 518,39III | 182,09 | 248,1928,03 |
| 5 | CAST 27/12/2009 02:00 | 29/12/2009 04:00 | 50 | 167,14I   | 181,37 | 250,1218,88 |
| 5 | PORT 21/12/2009 19:00 | 22/12/2009 11:00 | 16 | 52,22 I   | 163,18 | 221,2528,25 |
| 5 | PORT 23/12/2009 05:00 | 24/12/2009 03:00 | 22 | 54,41 I   | 164,52 | 221,2535,05 |
| 5 | SORR 01/01/2010 00:00 | 03/01/2010 11:00 | 59 | 875,54IV  | 242,88 | 249,4927,35 |
| 5 | SORR 05/01/2010 22:00 | 07/01/2010 11:00 | 37 | 282,54II  | 206,84 | 249,4932,91 |

---

|   |                       |                  |    |          |                   |
|---|-----------------------|------------------|----|----------|-------------------|
| 5 | SORR 10/01/2010 08:00 | 10/01/2010 23:00 | 15 | 184,07I  | 222,19249,4928,67 |
| 5 | CAST 06/01/2010 09:00 | 07/01/2010 11:00 | 26 | 66,20 I  | 215,85245,7320,26 |
| 5 | CAST 09/01/2010 09:00 | 11/01/2010 04:00 | 43 | 169,40I  | 162,45245,7318,02 |
| 5 | PORT 01/01/2010 06:00 | 01/01/2010 23:00 | 17 | 95,55 I  | 241,78225,0053,54 |
| 5 | PORT 08/01/2010 05:00 | 08/01/2010 19:00 | 14 | 45,34 I  | 165,07225,0027,53 |
| 5 | PORT 09/01/2010 02:00 | 11/01/2010 07:00 | 53 | 176,64I  | 158,76225,0037,69 |
| 5 | SORR 01/02/2010 00:00 | 01/02/2010 17:00 | 17 | 89,53 I  | 125,61249,7743,14 |
| 5 | SORR 03/02/2010 13:00 | 03/02/2010 23:00 | 10 | 25,30 I  | 180,25249,7725,21 |
| 5 | SORR 05/02/2010 17:00 | 06/02/2010 23:00 | 30 | 393,85II | 219,71249,7727,72 |
| 5 | SORR 10/02/2010 13:00 | 11/02/2010 22:00 | 33 | 364,49II | 230,65249,7727,20 |
| 5 | PORT 06/02/2010 17:00 | 07/02/2010 10:00 | 17 | 31,02 I  | 89,06 232,2229,56 |
| 5 | SORR 04/03/2010 05:00 | 06/03/2010 08:00 | 51 | 434,47II | 213,33182,5335,12 |
| 5 | SORR 07/03/2010 16:00 | 08/03/2010 11:00 | 19 | 77,89 I  | 27,65 182,5341,31 |
| 5 | SORR 10/03/2010 15:00 | 10/03/2010 23:00 | 8  | 55,27 I  | 246,22182,5332,88 |
| 5 | CAST 04/03/2010 10:00 | 05/03/2010 11:00 | 25 | 145,49I  | 257,61243,8016,71 |
| 5 | CAST 10/03/2010 09:00 | 11/03/2010 23:00 | 38 | 177,64I  | 208,72243,8020,24 |
| 5 | PORT 11/03/2010 05:00 | 11/03/2010 23:00 | 18 | 43,64 I  | 210,42219,5645,05 |
| 5 | SORR 31/03/2010 00:00 | 31/03/2010 11:00 | 11 | 55,84 I  | 245,67265,1037,52 |
| 5 | SORR 01/04/2010 12:00 | 03/04/2010 17:00 | 53 | 147,82I  | 169,09265,1028,50 |
| 5 | SORR 05/04/2010 00:00 | 06/04/2010 22:00 | 46 | 337,69II | 223,79265,1031,65 |
| 5 | CAST 31/03/2010 00:00 | 31/03/2010 11:00 | 11 | 36,38 I  | 245,67261,7619,99 |
| 5 | CAST 02/04/2010 17:00 | 03/04/2010 11:00 | 18 | 48,34 I  | 130,74261,7620,26 |
| 5 | CAST 05/04/2010 14:00 | 06/04/2010 17:00 | 27 | 103,60I  | 241,54261,7628,21 |
| 5 | SORR 19/04/2010 07:00 | 21/04/2010 11:00 | 52 | 255,05II | 181,92270,9524,94 |
| 5 | CAST 19/04/2010 18:00 | 20/04/2010 23:00 | 29 | 101,18I  | 198,62267,2119,84 |

---

|   |                       |                  |    |           |                      |
|---|-----------------------|------------------|----|-----------|----------------------|
| 5 | SORR 05/05/2010 17:00 | 08/05/2010 23:00 | 78 | 365,04II  | 209,42246,1429,67    |
| 5 | CAST 05/05/2010 16:00 | 08/05/2010 01:00 | 57 | 161,35I   | 199,60242,2118,78    |
| 5 | SORR 13/05/2010 12:00 | 14/05/2010 16:00 | 28 | 62,16 I   | 185,89249,9431,84    |
| 5 | SORR 15/05/2010 02:00 | 18/05/2010 23:00 | 93 | 1,01E+03  | IV 209,97249,9426,73 |
| 5 | CAST 15/05/2010 03:00 | 15/05/2010 11:00 | 8  | 45,69 I   | 250,56249,2226,28    |
| 5 | CAST 16/05/2010 04:00 | 18/05/2010 21:00 | 65 | 363,84II  | 195,53249,2214,80    |
| 5 | PORT 15/05/2010 16:00 | 15/05/2010 23:00 | 7  | 24,48 I   | 247,37238,1134,60    |
| 5 | SORR 30/05/2010 16:00 | 31/05/2010 11:00 | 19 | 138,14I   | 197,15263,3828,22    |
| 5 | SORR 03/06/2010 08:00 | 03/06/2010 23:00 | 15 | 37,47 I   | 201,19260,3826,51    |
| 5 | SORR 18/06/2010 19:00 | 21/06/2010 11:00 | 64 | 436,08II  | 195,11267,7927,73    |
| 5 | SORR 22/06/2010 05:00 | 22/06/2010 17:00 | 12 | 64,08 I   | 155,23267,7934,13    |
| 5 | SORR 24/06/2010 12:00 | 25/06/2010 11:00 | 23 | 51,77 I   | 141,25267,7923,81    |
| 5 | CAST 19/06/2010 00:00 | 22/06/2010 11:00 | 83 | 328,36II  | 199,49257,4617,88    |
| 5 | SORR 24/07/2010 06:00 | 25/07/2010 07:00 | 25 | 179,96I   | 181,54275,7226,28    |
| 5 | CAST 24/07/2010 07:00 | 25/07/2010 05:00 | 22 | 72,35 I   | 194,78264,2819,74    |
| 5 | SORR 28/08/2010 16:00 | 29/08/2010 11:00 | 19 | 71,28 I   | 172,2 266,5520,49    |
| 5 | SORR 30/08/2010 12:00 | 30/08/2010 23:00 | 11 | 65,56 I   | 250,67266,5524,12    |
| 5 | SORR 25/09/2010 09:00 | 28/09/2010 16:00 | 79 | 566,44III | 199,62266,4224,14    |
| 5 | CAST 25/09/2010 11:00 | 28/09/2010 01:00 | 62 | 282,35II  | 216,40259,9319,49    |
| 5 | SORR 14/10/2010 15:00 | 16/10/2010 11:00 | 44 | 192,93I   | 128,98242,5224,67    |
| 5 | SORR 17/10/2010 04:00 | 17/10/2010 11:00 | 7  | 39,98 I   | 164,87242,5229,86    |
| 5 | CAST 15/10/2010 15:00 | 16/10/2010 17:00 | 26 | 66,98 I   | 142,26252,7815,45    |
| 5 | CAST 17/10/2010 05:00 | 17/10/2010 14:00 | 9  | 28,66 I   | 190,1 252,7818,83    |
| 5 | SORR 08/11/2010 03:00 | 09/11/2010 11:00 | 32 | 597,82III | 216,79223,8736,44    |
| 5 | CAST 10/11/2010 00:00 | 10/11/2010 23:00 | 23 | 117,69I   | 204,29241,7219,78    |

---

|   |                       |                  |     |           |                   |
|---|-----------------------|------------------|-----|-----------|-------------------|
| 5 | PORT 08/11/2010 05:00 | 10/11/2010 23:00 | 66  | 317,87II  | 211,42222,3732,25 |
| 5 | SORR 18/11/2010 09:00 | 19/11/2010 11:00 | 26  | 218,86I   | 177,48240,6933,02 |
| 5 | SORR 21/11/2010 20:00 | 23/11/2010 23:00 | 51  | 589 III   | 202,54240,6928,74 |
| 5 | PORT 17/11/2010 03:00 | 17/11/2010 23:00 | 20  | 55,56 I   | 123,19226,4338,27 |
| 5 | SORR 01/12/2010 09:00 | 05/12/2010 17:00 | 104 | 939,87IV  | 179,83248,6827,83 |
| 5 | CAST 03/12/2010 08:00 | 03/12/2010 17:00 | 9   | 38,39 I   | 205,5 247,0117,18 |
| 5 | PORT 01/12/2010 02:00 | 02/12/2010 11:00 | 33  | 88,74 I   | 201,32223,4548,00 |
| 5 | PORT 03/12/2010 00:00 | 03/12/2010 14:00 | 14  | 29,64 I   | 246,73223,4532,99 |
| 5 | SORR 15/12/2010 13:00 | 16/12/2010 11:00 | 22  | 47,14 I   | 56,70 167,8946,03 |
| 5 | SORR 17/12/2010 19:00 | 18/12/2010 23:00 | 28  | 581,12III | 234,65167,8930,25 |
| 5 | PORT 17/12/2010 17:00 | 18/12/2010 12:00 | 19  | 111,46I   | 243,9 234,2643,23 |
| 5 | SORR 24/12/2010 04:00 | 26/12/2010 18:00 | 62  | 589,89III | 184,84222,5128,70 |
| 5 | PORT 23/12/2010 05:00 | 23/12/2010 11:00 | 6   | 30,44 I   | 146,29219,5130,64 |
| 5 | PORT 24/12/2010 10:00 | 24/12/2010 23:00 | 13  | 38,45 I   | 212,79219,5138,67 |
| 5 | SORR 27/01/2011 18:00 | 28/01/2011 06:00 | 12  | 28,99 I   | 23,61 64,21 44,11 |
| 5 | SORR 16/02/2011 12:00 | 17/02/2011 10:00 | 22  | 293,45II  | 199,04126,8833,47 |
| 5 | SORR 23/02/2011 09:00 | 24/02/2011 23:00 | 38  | 126,91I   | 36,77 126,8834,34 |
| 5 | PORT 16/02/2011 06:00 | 17/02/2011 04:00 | 22  | 102,93I   | 190,83223,8324,49 |
| 5 | SORR 03/05/2011 15:00 | 03/05/2011 23:00 | 8   | 28,72 I   | 214,83256,6440,14 |
| 5 | CAST 03/05/2011 15:00 | 04/05/2011 23:00 | 32  | 75,34 I   | 185,77249,3115,15 |
| 5 | SORR 01/06/2011 20:00 | 02/06/2011 21:00 | 25  | 231,40I   | 169,81257,0327,42 |
| 5 | SORR 07/10/2011 08:00 | 08/10/2011 09:00 | 25  | 175,24I   | 128,21232,3831,30 |
| 5 | SORR 03/12/2011 17:00 | 04/12/2011 23:00 | 30  | 158,19I   | 189,06238,6732,66 |
| 5 | SORR 05/01/2012 11:00 | 05/01/2012 23:00 | 12  | 135,83I   | 233,69256,7425,08 |
| 5 | CAST 05/01/2012 12:00 | 05/01/2012 23:00 | 11  | 46,34 I   | 234,40254,0821,06 |

---

|   |                       |                  |    |          |                   |
|---|-----------------------|------------------|----|----------|-------------------|
| 5 | SORR 19/02/2012 01:00 | 19/02/2012 11:00 | 10 | 31,97 I  | 177,24249,6633,27 |
| 5 | SORR 07/04/2012 17:00 | 08/04/2012 23:00 | 30 | 262,16II | 196,38250,3728,11 |
| 5 | SORR 11/04/2012 16:00 | 12/04/2012 11:00 | 19 | 143,76I  | 226,87250,3726,62 |
| 5 | SORR 14/04/2012 08:00 | 15/04/2012 13:00 | 29 | 384,46II | 234,72250,3726,41 |
| 5 | SORR 15/04/2012 20:00 | 16/04/2012 23:00 | 27 | 92,09 I  | 140,24250,3736,19 |
| 5 | SORR 18/04/2012 05:00 | 21/04/2012 11:00 | 78 | 772,59IV | 211,54250,3728,98 |
| 5 | SORR 25/04/2012 00:00 | 26/04/2012 01:00 | 25 | 117,95I  | 184,67250,3723,29 |
| 5 | CAST 07/04/2012 12:00 | 07/04/2012 23:00 | 11 | 57,73 I  | 249,36252,0921,01 |
| 5 | CAST 11/04/2012 18:00 | 12/04/2012 11:00 | 17 | 46,22 I  | 225,39252,0919,80 |
| 5 | CAST 14/04/2012 08:00 | 15/04/2012 15:00 | 31 | 240,97I  | 229,82252,0919,54 |
| 5 | CAST 19/04/2012 06:00 | 21/04/2012 23:00 | 65 | 297,17II | 208,82252,0918,24 |
| 5 | CAST 25/04/2012 00:00 | 25/04/2012 23:00 | 23 | 82,91 I  | 197,12252,0918,68 |
| 5 | PORT 08/04/2012 06:00 | 09/04/2012 11:00 | 29 | 81,15 I  | 113,67235,0331,13 |
| 5 | PORT 19/04/2012 01:00 | 19/04/2012 17:00 | 16 | 31,92 I  | 203,84235,0334,66 |
| 5 | PORT 20/04/2012 22:00 | 21/04/2012 10:00 | 12 | 26,99 I  | 201,58235,0337,13 |
| 5 | SORR 07/05/2012 00:00 | 09/05/2012 11:00 | 59 | 245,53I  | 181,15254,2627,05 |
| 5 | CAST 07/05/2012 13:00 | 08/05/2012 17:00 | 28 | 72,37 I  | 183,98254,2318,78 |
| 5 | SORR 21/05/2012 13:00 | 24/05/2012 23:00 | 82 | 436,91II | 176,98245,5528,45 |
| 5 | CAST 21/05/2012 14:00 | 24/05/2012 20:00 | 78 | 336,34II | 176,75247,2216,28 |
| 5 | PORT 22/05/2012 03:00 | 23/05/2012 18:00 | 39 | 92,15 I  | 176,5 233,4533,42 |
| 5 | SORR 04/06/2012 13:00 | 04/06/2012 19:00 | 6  | 27,49 I  | 232,55258,0534,88 |
| 5 | SORR 05/06/2012 02:00 | 05/06/2012 23:00 | 21 | 111,98I  | 179,69258,0520,94 |
| 5 | SORR 31/08/2012 22:00 | 01/09/2012 14:00 | 16 | 89,54 I  | 289,89245,9820,87 |
| 5 | SORR 04/09/2012 12:00 | 06/09/2012 11:00 | 47 | 292,32II | 170,29245,9831,10 |
| 5 | CAST 05/09/2012 23:00 | 06/09/2012 11:00 | 12 | 82,30 I  | 233,42247,1118,53 |

---

|   |                       |                  |    |          |                     |
|---|-----------------------|------------------|----|----------|---------------------|
| 5 | PORT 04/09/2012 13:00 | 05/09/2012 04:00 | 15 | 34,43 I  | 140,46227,0530,05   |
| 5 | SORR 02/10/2012 12:00 | 03/10/2012 23:00 | 35 | 166,48I  | 220,93252,1820,91   |
| 5 | CAST 02/10/2012 13:00 | 03/10/2012 11:00 | 22 | 76,55 I  | 240,06261,1618,13   |
| 5 | SORR 09/10/2012 12:00 | 10/10/2012 04:00 | 16 | 42,72 I  | 180,99256,8925,25   |
| 5 | SORR 10/10/2012 12:00 | 10/10/2012 23:00 | 11 | 35,27 I  | 178,36256,8922,92   |
| 5 | SORR 15/10/2012 05:00 | 17/10/2012 06:00 | 49 | 294,36II | 180,42247,0430,81   |
| 5 | CAST 16/10/2012 00:00 | 16/10/2012 23:00 | 23 | 131,40I  | 231,08257,0122,18   |
| 5 | SORR 26/10/2012 23:00 | 29/10/2012 23:00 | 72 | 968,41IV | 223,76243,0831,07   |
| 5 | CAST 28/10/2012 00:00 | 28/10/2012 11:00 | 11 | 61,93 I  | 293,32248,9118,22   |
| 5 | CAST 29/10/2012 04:00 | 29/10/2012 21:00 | 17 | 80,51 I  | 175,69248,9116,94   |
| 5 | PORT 26/10/2012 19:00 | 27/10/2012 23:00 | 28 | 78,96 I  | 206,17224,6225,44   |
| 5 | PORT 28/10/2012 17:00 | 29/10/2012 23:00 | 30 | 113,25I  | 189,83224,6243,99   |
| 5 | SORR 28/11/2012 04:00 | 01/12/2012 11:00 | 79 | 1,29E+03 | V 209,17226,0832,17 |
| 5 | SORR 01/12/2012 05:00 | 01/12/2012 11:00 | 6  | 33,31 I  | NaN 226,0841,36     |
| 5 | CAST 28/11/2012 17:00 | 30/11/2012 11:00 | 42 | 812,13IV | 205,34238,6419,32   |
| 5 | PORT 28/11/2012 04:00 | 30/11/2012 19:00 | 63 | 422,59II | 188,83215,6130,32   |
| 5 | SORR 14/12/2012 14:00 | 17/12/2012 23:00 | 81 | 367,93II | 185,48259,9731,30   |
| 5 | SORR 18/12/2012 12:00 | 20/12/2012 05:00 | 41 | 305,43II | 59,25 259,9736,53   |
| 5 | CAST 15/12/2012 18:00 | 16/12/2012 11:00 | 17 | 51,19 I  | NaN 251,7322,19     |
| 5 | CAST 17/12/2012 08:00 | 19/12/2012 11:00 | 51 | 439,54II | 105,24251,7314,43   |
| 5 | PORT 15/12/2012 13:00 | 16/12/2012 09:00 | 20 | 64,82 I  | NaN 232,9336,19     |
| 5 | SORR 27/12/2012 06:00 | 27/12/2012 23:00 | 17 | 59,85 I  | 241,21271,4326,74   |
| 5 | SORR 28/12/2012 13:00 | 29/12/2012 09:00 | 20 | 63,69 I  | 48,94 271,4336,76   |
| 7 | SORR 19/05/2008 21:00 | 22/05/2008 23:00 | 74 | 712,51IV | 203,27230,4332,92   |
| 7 | CAST 19/05/2008 22:00 | 22/05/2008 21:00 | 71 | 392,62II | 201,93239,3320,02   |

---

|   |                       |                  |    |          |                   |
|---|-----------------------|------------------|----|----------|-------------------|
| 7 | SORR 03/06/2008 19:00 | 05/06/2008 23:00 | 52 | 231,28I  | 184,72255,0927,34 |
| 7 | SORR 06/06/2008 13:00 | 08/06/2008 23:00 | 58 | 177,42I  | 187,58255,0926,46 |
| 7 | CAST 04/06/2008 10:00 | 05/06/2008 23:00 | 37 | 134,15I  | 211,13253,9419,72 |
| 7 | CAST 08/06/2008 08:00 | 08/06/2008 19:00 | 11 | 29,37 I  | 217,58253,9416,06 |
| 7 | SORR 23/07/2008 12:00 | 25/07/2008 10:00 | 46 | 198,77I  | 191,78272,7726,03 |
| 7 | SORR 13/09/2008 08:00 | 13/09/2008 23:00 | 15 | 68,18 I  | 234,06245,5135,04 |
| 7 | SORR 15/09/2008 12:00 | 16/09/2008 11:00 | 23 | 70,03 I  | 185,12245,5132,36 |
| 7 | SORR 03/10/2008 00:00 | 06/10/2008 07:00 | 79 | 345,55II | 180,07261,2525,44 |
| 7 | CAST 04/10/2008 00:00 | 04/10/2008 11:00 | 11 | 88,70 I  | 237,42259,4022,52 |
| 7 | SORR 29/10/2008 21:00 | 31/10/2008 07:00 | 34 | 355,45II | 212,77220,8130,15 |
| 7 | SORR 31/10/2008 22:00 | 01/11/2008 23:00 | 25 | 164,05I  | 192,08220,8132,47 |
| 7 | CAST 30/10/2008 01:00 | 30/10/2008 11:00 | 10 | 54,67 I  | 219,09228,8920,95 |
| 7 | CAST 31/10/2008 00:00 | 31/10/2008 08:00 | 8  | 23,11    | 188,11228,8920,74 |
| 7 | CAST 01/11/2008 03:00 | 01/11/2008 11:00 | 8  | 28,18 I  | 212,56228,8924,59 |
| 7 | PORT 29/10/2008 12:00 | 31/10/2008 05:00 | 41 | 107,67I  | 202,79215,8136,95 |
| 7 | PORT 31/10/2008 21:00 | 01/11/2008 20:00 | 23 | 53,42 I  | 194,87215,8120,43 |
| 7 | SORR 21/11/2008 00:00 | 21/11/2008 23:00 | 23 | 253,19II | 243 224,5628,5    |
| 7 | SORR 24/11/2008 12:00 | 25/11/2008 21:00 | 33 | 348,87II | 191,97224,5636,18 |
| 7 | SORR 28/11/2008 08:00 | 30/11/2008 23:00 | 63 | 694 III  | 188 224,5631,96   |
| 7 | PORT 21/11/2008 10:00 | 22/11/2008 23:00 | 37 | 124,43I  | 195,45222,8027,98 |
| 7 | PORT 24/11/2008 14:00 | 25/11/2008 14:00 | 24 | 126,97I  | 176,68222,8029,91 |
| 7 | PORT 28/11/2008 08:00 | 30/11/2008 23:00 | 63 | 230,60I  | 188 222,8026,87   |
| 7 | SORR 01/12/2008 00:00 | 02/12/2008 11:00 | 35 | 349,86II | 184,67218,4030,88 |
| 7 | SORR 03/12/2008 23:00 | 06/12/2008 23:00 | 72 | 950,62IV | 192,57218,4031,63 |
| 7 | CAST 04/12/2008 16:00 | 07/12/2008 10:00 | 66 | 455,16II | 207,33248,8320,90 |



---

|   |                       |                  |     |             |                   |
|---|-----------------------|------------------|-----|-------------|-------------------|
| 7 | PORT 01/12/2008 12:00 | 02/12/2008 10:00 | 22  | 79,14 I     | 177,83235,5727,63 |
| 7 | PORT 05/12/2008 03:00 | 06/12/2008 23:00 | 44  | 217,05I     | 226,02235,5744,75 |
| 7 | SORR 12/12/2008 02:00 | 13/12/2008 23:00 | 45  | 333,64II    | 187,39212,9626,65 |
| 7 | SORR 15/12/2008 00:00 | 17/12/2008 11:00 | 59  | 148,72I     | 118,7 212,9628,71 |
| 7 | CAST 12/12/2008 16:00 | 13/12/2008 11:00 | 19  | 94,56 I     | 210,25231,4716,08 |
| 7 | CAST 15/12/2008 05:00 | 15/12/2008 19:00 | 14  | 37,67 I     | 140,4 231,4724,75 |
| 7 | PORT 11/12/2008 03:00 | 11/12/2008 18:00 | 15  | 52,47 I     | 198,25204,8922,37 |
| 7 | PORT 12/12/2008 19:00 | 13/12/2008 18:00 | 23  | 56,82 I     | 206,83204,8946,44 |
| 7 | PORT 15/12/2008 00:00 | 16/12/2008 14:00 | 38  | 130,69I     | 139,67204,8924,92 |
| 7 | SORR 01/01/2009 09:00 | 01/01/2009 23:00 | 14  | 150,96I     | 207,8 227,0031,63 |
| 7 | SORR 02/01/2009 20:00 | 03/01/2009 11:00 | 15  | 130,99I     | 143,56227,0034,81 |
| 7 | CAST 01/01/2009 12:00 | 01/01/2009 23:00 | 11  | 72,01 I     | 210,17235,7120,49 |
| 7 | PORT 01/01/2009 15:00 | 01/01/2009 23:00 | 8   | 26,49 I     | 214,89226,9734,62 |
| 7 | SORR 14/01/2009 10:00 | 15/01/2009 11:00 | 25  | 154,96I     | 177,54191,6129,55 |
| 7 | SORR 04/02/2009 03:00 | 05/02/2009 11:00 | 32  | 197,22I     | 206 232,7528,88   |
| 7 | SORR 06/02/2009 15:00 | 11/02/2009 23:00 | 128 | 1,01E+03 IV | 194,27232,7527,80 |
| 7 | CAST 04/02/2009 05:00 | 04/02/2009 11:00 | 6   | 44,68 I     | 240 238,3619,09   |
| 7 | CAST 09/02/2009 07:00 | 10/02/2009 04:00 | 21  | 87,02 I     | 118,5 238,3612,90 |
| 7 | CAST 10/02/2009 13:00 | 11/02/2009 11:00 | 22  | 162,40I     | 234,61238,3620,06 |
| 7 | PORT 03/02/2009 00:00 | 03/02/2009 12:00 | 12  | 66,26 I     | 143,08223,2524,41 |
| 7 | PORT 06/02/2009 16:00 | 07/02/2009 13:00 | 21  | 44,95 I     | 165,18223,2526,67 |
| 7 | PORT 11/02/2009 05:00 | 11/02/2009 22:00 | 17  | 42,18 I     | 259,78223,2533,57 |
| 7 | SORR 05/03/2009 02:00 | 05/03/2009 23:00 | 21  | 362,44II    | 216,5 252,2532,66 |
| 7 | SORR 06/03/2009 15:00 | 07/03/2009 08:00 | 17  | 36,59 I     | 211,67252,2548,93 |
| 7 | SORR 08/03/2009 13:00 | 10/03/2009 23:00 | 58  | 269,27II    | 202,88252,2529,98 |

---

|   |                       |                  |    |           |                   |
|---|-----------------------|------------------|----|-----------|-------------------|
| 7 | SORR 11/03/2009 12:00 | 11/03/2009 19:00 | 7  | 38,02 I   | 143,87252,2525,43 |
| 7 | CAST 11/03/2009 00:00 | 11/03/2009 11:00 | 11 | 65,99 I   | 195,17256,6322,31 |
| 7 | PORT 05/03/2009 00:00 | 05/03/2009 11:00 | 11 | 63,35 I   | 180,67205,5820,25 |
| 7 | SORR 23/03/2009 15:00 | 27/03/2009 05:00 | 86 | 599,09III | 202,28250,6525,98 |
| 7 | CAST 24/03/2009 08:00 | 25/03/2009 11:00 | 27 | 217,45I   | 218,18255,3021,30 |
| 7 | CAST 26/03/2009 09:00 | 26/03/2009 20:00 | 11 | 46,63 I   | 207,92255,3017,09 |
| 7 | SORR 28/04/2009 01:00 | 01/05/2009 22:00 | 93 | 597,61III | 174,15251,6227,37 |
| 7 | CAST 28/04/2009 08:00 | 01/05/2009 21:00 | 85 | 417,63II  | 172,80250,0118,24 |
| 7 | PORT 28/04/2009 13:00 | 28/04/2009 23:00 | 10 | 24,45 I   | 210,64238,0526,53 |
| 7 | SORR 01/06/2009 20:00 | 02/06/2009 11:00 | 15 | 166,61I   | 232,37248,4828,32 |
| 7 | SORR 03/06/2009 04:00 | 03/06/2009 23:00 | 19 | 53,15 I   | 192,45248,4830,44 |
| 7 | CAST 03/06/2009 12:00 | 03/06/2009 23:00 | 11 | 33,64 I   | 233,17250,1321,44 |
| 7 | SORR 21/06/2009 06:00 | 22/06/2009 11:00 | 29 | 142,94I   | 164,87253,5533,14 |
| 7 | SORR 24/06/2009 12:00 | 26/06/2009 16:00 | 52 | 122,35I   | 170,58253,5525,60 |
| 7 | SORR 29/06/2009 04:00 | 29/06/2009 20:00 | 16 | 31,88 I   | 143,70253,5524,12 |
| 7 | SORR 03/08/2009 14:00 | 05/08/2009 01:00 | 35 | 111,40I   | 179,56248,9529    |
| 7 | SORR 18/09/2009 01:00 | 18/09/2009 23:00 | 22 | 61,78 I   | 153,17261,5223,39 |
| 7 | SORR 12/10/2009 10:00 | 13/10/2009 06:00 | 20 | 156,87I   | 231,29201,8331,59 |
| 7 | SORR 03/11/2009 00:00 | 03/11/2009 23:00 | 23 | 265,50II  | 249,96241,4925,73 |
| 7 | SORR 05/11/2009 04:00 | 05/11/2009 11:00 | 7  | 58,97 I   | 232 241,4931,18   |
| 7 | SORR 08/11/2009 05:00 | 09/11/2009 23:00 | 42 | 410,52II  | 162,44241,4933,77 |
| 7 | SORR 11/11/2009 08:00 | 12/11/2009 22:00 | 38 | 122,20I   | 119,10241,4935,87 |
| 7 | CAST 03/11/2009 01:00 | 05/11/2009 20:00 | 67 | 316,47II  | 199,28243,6719,46 |
| 7 | CAST 06/11/2009 15:00 | 07/11/2009 13:00 | 22 | 53,93 I   | 146,96243,6716,86 |
| 7 | CAST 08/11/2009 07:00 | 09/11/2009 23:00 | 40 | 235,19I   | 162,63243,6721,98 |

---

|   |                       |                  |    |           |                   |
|---|-----------------------|------------------|----|-----------|-------------------|
| 7 | CAST 10/11/2009 12:00 | 11/11/2009 19:00 | 31 | 75,49 I   | 130,53243,6724,19 |
| 7 | PORT 08/11/2009 05:00 | 09/11/2009 23:00 | 42 | 108,46I   | 162,44228,1430,68 |
| 7 | SORR 27/11/2009 07:00 | 29/11/2009 01:00 | 42 | 238,82I   | 158,64225,4035,48 |
| 7 | SORR 30/11/2009 17:00 | 30/11/2009 23:00 | 6  | 54,69 I   | 199,14225,4036,12 |
| 7 | CAST 28/11/2009 14:00 | 28/11/2009 23:00 | 9  | 26,61 I   | 106,17233,2417,29 |
| 7 | PORT 30/11/2009 00:00 | 30/11/2009 11:00 | 11 | 32,01 I   | 153,42210,2830,23 |
| 7 | SORR 01/12/2009 00:00 | 01/12/2009 22:00 | 22 | 132,91I   | 178,78251,3235,83 |
| 7 | SORR 02/12/2009 13:00 | 03/12/2009 11:00 | 22 | 64,12 I   | 124,61251,3234,54 |
| 7 | SORR 04/12/2009 11:00 | 04/12/2009 23:00 | 12 | 144,53I   | 182,77251,3232,67 |
| 7 | SORR 06/12/2009 15:00 | 07/12/2009 19:00 | 28 | 51,90 I   | 121,10251,3221,29 |
| 7 | SORR 08/12/2009 12:00 | 09/12/2009 12:00 | 24 | 154,40I   | 172,68251,3235,15 |
| 7 | CAST 08/12/2009 13:00 | 08/12/2009 23:00 | 10 | 49,58 I   | 230,73246,0320,80 |
| 7 | SORR 16/12/2009 11:00 | 17/12/2009 11:00 | 24 | 204,33I   | 188,4 203,5024,34 |
| 7 | CAST 16/12/2009 11:00 | 18/12/2009 23:00 | 60 | 349,96II  | 202,97253,8618,06 |
| 7 | SORR 22/12/2009 14:00 | 23/12/2009 14:00 | 24 | 143,56I   | 167,16240,1636,79 |
| 7 | SORR 27/12/2009 00:00 | 29/12/2009 10:00 | 58 | 546,92III | 182,19240,1628,06 |
| 7 | CAST 22/12/2009 01:00 | 23/12/2009 17:00 | 40 | 97,38 I   | 163,93240,7621,29 |
| 7 | CAST 27/12/2009 04:00 | 29/12/2009 07:00 | 51 | 276,99II  | 180,02240,7618,78 |
| 7 | PORT 21/12/2009 19:00 | 22/12/2009 11:00 | 16 | 65,19 I   | 163,18215,4728,25 |
| 7 | PORT 23/12/2009 05:00 | 24/12/2009 02:00 | 21 | 52,78 I   | 164,41215,4735,31 |
| 7 | SORR 01/01/2010 00:00 | 03/01/2010 11:00 | 59 | 765,10IV  | 242,88238,7227,35 |
| 7 | SORR 05/01/2010 22:00 | 07/01/2010 11:00 | 37 | 307,49II  | 206,84238,7232,91 |
| 7 | SORR 09/01/2010 09:00 | 09/01/2010 23:00 | 14 | 232,54I   | 190,4 238,7233,51 |
| 7 | CAST 01/01/2010 03:00 | 01/01/2010 11:00 | 8  | 60,60 I   | 237,56237,1121,25 |
| 7 | CAST 06/01/2010 05:00 | 07/01/2010 11:00 | 30 | 149,75I   | 212,48237,1120,56 |

---

|   |                       |                  |    |          |                   |
|---|-----------------------|------------------|----|----------|-------------------|
| 7 | CAST 09/01/2010 03:00 | 09/01/2010 11:00 | 8  | 54,85 I  | 195,56237,1123,36 |
| 7 | PORT 01/01/2010 16:00 | 01/01/2010 23:00 | 7  | 44,66 I  | 238,25219,6548,91 |
| 7 | PORT 09/01/2010 02:00 | 10/01/2010 23:00 | 45 | 170,67I  | 183,13219,6538,71 |
| 7 | SORR 01/02/2010 00:00 | 01/02/2010 17:00 | 17 | 105,12I  | 125,61237,5243,14 |
| 7 | SORR 03/02/2010 12:00 | 03/02/2010 23:00 | 11 | 31,58 I  | 180,25237,5225,14 |
| 7 | SORR 05/02/2010 21:00 | 07/02/2010 21:00 | 48 | 400,48II | 145,47237,5236,17 |
| 7 | SORR 10/02/2010 13:00 | 11/02/2010 11:00 | 22 | 235,36I  | 227,61237,5229,02 |
| 7 | SORR 04/03/2010 04:00 | 06/03/2010 08:00 | 52 | 428,30II | 213,04184,5135,00 |
| 7 | SORR 08/03/2010 12:00 | 09/03/2010 00:00 | 12 | 43,17 I  | 26,08 184,5128,25 |
| 7 | SORR 09/03/2010 15:00 | 10/03/2010 23:00 | 32 | 160,10I  | 216,85184,5127,67 |
| 7 | CAST 04/03/2010 11:00 | 05/03/2010 11:00 | 24 | 208,30I  | 260,08227,0616,57 |
| 7 | CAST 09/03/2010 21:00 | 11/03/2010 23:00 | 50 | 268,91II | 202,35227,0621,24 |
| 7 | PORT 11/03/2010 04:00 | 11/03/2010 23:00 | 19 | 49,63 I  | 206,8 211,6045,21 |
| 7 | SORR 31/03/2010 00:00 | 31/03/2010 11:00 | 11 | 77,01 I  | 245,67257,6637,52 |
| 7 | SORR 01/04/2010 13:00 | 03/04/2010 17:00 | 52 | 168,34I  | 169,11257,6628,41 |
| 7 | SORR 04/04/2010 22:00 | 06/04/2010 23:00 | 49 | 362,15II | 224,98257,6631,71 |
| 7 | CAST 31/03/2010 00:00 | 31/03/2010 11:00 | 11 | 37,76 I  | 245,67256,4519,99 |
| 7 | CAST 02/04/2010 13:00 | 03/04/2010 11:00 | 22 | 61,60 I  | 147,61256,4520,63 |
| 7 | CAST 05/04/2010 01:00 | 05/04/2010 22:00 | 21 | 175,55I  | 256,77256,4521,13 |
| 7 | SORR 19/04/2010 07:00 | 21/04/2010 11:00 | 52 | 276,52II | 181,92266,9124,94 |
| 7 | CAST 19/04/2010 09:00 | 21/04/2010 10:00 | 49 | 175,25I  | 183,73263,9018,28 |
| 7 | SORR 05/05/2010 17:00 | 06/05/2010 11:00 | 18 | 158,14I  | 219 233,8633,06   |
| 7 | SORR 07/05/2010 01:00 | 08/05/2010 08:00 | 31 | 109,04I  | 178,37233,8630,59 |
| 7 | CAST 05/05/2010 15:00 | 08/05/2010 00:00 | 57 | 216,04I  | 200,5 237,5118,84 |
| 7 | SORR 13/05/2010 12:00 | 14/05/2010 16:00 | 28 | 72,38 I  | 185,89242,3431,84 |

---

|   |                       |                  |    |           |    |                     |
|---|-----------------------|------------------|----|-----------|----|---------------------|
| 7 | SORR 15/05/2010 03:00 | 18/05/2010 11:00 | 80 | 1,00E+03  | IV | 207,26242,3426,91   |
| 7 | CAST 15/05/2010 04:00 | 18/05/2010 20:00 | 88 | 703,53IV  |    | 208,58244,9716,58   |
| 7 | SORR 29/05/2010 15:00 | 29/05/2010 23:00 | 8  | 112,22I   |    | 152,56252,0228,65   |
| 7 | SORR 30/05/2010 16:00 | 31/05/2010 11:00 | 19 | 228,52I   |    | 197,15252,0228,22   |
| 7 | SORR 01/06/2010 10:00 | 01/06/2010 23:00 | 13 | 54,83 I   |    | 231,071 252,0227,49 |
| 7 | CAST 01/06/2010 11:00 | 01/06/2010 23:00 | 12 | 34,50 I   |    | 247,77246,7914,26   |
| 7 | SORR 03/06/2010 03:00 | 03/06/2010 23:00 | 20 | 57,27 I   |    | 179,24246,1926,76   |
| 7 | SORR 18/06/2010 19:00 | 21/06/2010 11:00 | 64 | 461,25II  |    | 195,11260,9827,73   |
| 7 | SORR 22/06/2010 03:00 | 22/06/2010 10:00 | 7  | 28,35 I   |    | 108,37260,9835,97   |
| 7 | SORR 24/06/2010 13:00 | 25/06/2010 11:00 | 22 | 47,90 I   |    | 138,09260,9823,30   |
| 7 | CAST 18/06/2010 19:00 | 22/06/2010 11:00 | 88 | 421,31II  |    | 200,50253,7717,87   |
| 7 | SORR 24/07/2010 07:00 | 25/07/2010 08:00 | 25 | 184,22I   |    | 175,35270,7027,58   |
| 7 | CAST 24/07/2010 08:00 | 25/07/2010 05:00 | 21 | 85,87 I   |    | 192,82262,5019,85   |
| 7 | SORR 28/08/2010 16:00 | 29/08/2010 10:00 | 18 | 70,06 I   |    | 170,63263,9519,88   |
| 7 | SORR 30/08/2010 12:00 | 31/08/2010 07:00 | 19 | 107,22I   |    | 179,7 263,9530,65   |
| 7 | SORR 25/09/2010 10:00 | 28/09/2010 17:00 | 79 | 584,00III |    | 203,25259,9323,85   |
| 7 | CAST 25/09/2010 11:00 | 28/09/2010 01:00 | 62 | 331,81II  |    | 216,40255,6019,49   |
| 7 | SORR 14/10/2010 22:00 | 16/10/2010 11:00 | 37 | 178,34I   |    | 116,42248,7123,43   |
| 7 | SORR 17/10/2010 04:00 | 17/10/2010 11:00 | 7  | 36,07 I   |    | 164,87248,7129,86   |
| 7 | CAST 15/10/2010 08:00 | 16/10/2010 16:00 | 32 | 87,23 I   |    | 153,64247,6515,60   |
| 7 | CAST 17/10/2010 05:00 | 17/10/2010 11:00 | 6  | 26,75 I   |    | 179 247,6518,01     |
| 7 | SORR 08/11/2010 03:00 | 09/11/2010 23:00 | 44 | 827,39IV  |    | 215,02224,7235,23   |
| 7 | CAST 08/11/2010 08:00 | 10/11/2010 23:00 | 63 | 365,91II  |    | 211,58235,3619,72   |
| 7 | PORT 08/11/2010 06:00 | 10/11/2010 11:00 | 53 | 248,27I   |    | 213,28217,0928,85   |
| 7 | SORR 18/11/2010 08:00 | 19/11/2010 20:00 | 36 | 291,77II  |    | 180,89237,3131,83   |

---

|   |                       |                  |    |            |                   |       |
|---|-----------------------|------------------|----|------------|-------------------|-------|
| 7 | SORR 20/11/2010 20:00 | 21/11/2010 06:00 | 10 | 51,47 I    | 183,82237,3134,55 |       |
| 7 | SORR 21/11/2010 20:00 | 23/11/2010 23:00 | 51 | 534,71 III | 202,54237,3128,74 |       |
| 7 | CAST 17/11/2010 00:00 | 18/11/2010 03:00 | 27 | 57,37 I    | 111,64244,0818,26 |       |
| 7 | CAST 22/11/2010 04:00 | 24/11/2010 22:00 | 66 | 427,12 II  | 202,88244,0818,97 |       |
| 7 | PORT 17/11/2010 05:00 | 18/11/2010 06:00 | 25 | 55,53 I    | 109,11223,2843,72 |       |
| 7 | PORT 21/11/2010 09:00 | 21/11/2010 21:00 | 12 | 26,58 I    | 158,61223,2826,15 |       |
| 7 | SORR 01/12/2010 13:00 | 05/12/2010 11:00 | 94 | 913,78 IV  | 177,8 240,7227,92 |       |
| 7 | CAST 01/12/2010 13:00 | 02/12/2010 15:00 | 26 | 98,89 I    | 215,44241,8319,63 |       |
| 7 | CAST 03/12/2010 02:00 | 03/12/2010 21:00 | 19 | 84,25 I    | 192,9 241,8317,87 |       |
| 7 | CAST 04/12/2010 08:00 | 05/12/2010 01:00 | 17 | 81,54 I    | 207,39241,8317,07 |       |
| 7 | PORT 02/12/2010 00:00 | 03/12/2010 13:00 | 37 | 84,19 I    | 212,71219,7549,65 |       |
| 7 | SORR 14/12/2010 22:00 | 16/12/2010 08:00 | 34 | 77,36 I    | 53,37 155,3142,67 |       |
| 7 | SORR 17/12/2010 17:00 | 18/12/2010 23:00 | 30 | 566,08 III | 235,16155,3130,03 |       |
| 7 | CAST 17/12/2010 19:00 | 18/12/2010 22:00 | 27 | 247,74 I   | 242,89197,0220,75 |       |
| 7 | PORT 17/12/2010 17:00 | 17/12/2010 23:00 | 6  | 24,95 I    | 226,57239,058     | 36,26 |
| 7 | SORR 23/12/2010 12:00 | 26/12/2010 19:00 | 79 | 682,69 III | 179,52215,4728,54 |       |
| 7 | CAST 24/12/2010 10:00 | 24/12/2010 23:00 | 13 | 63,80 I    | 212,79230,5418,70 |       |
| 7 | CAST 25/12/2010 13:00 | 26/12/2010 07:00 | 18 | 51,46 I    | 146,84230,5416,11 |       |
| 7 | PORT 23/12/2010 00:00 | 23/12/2010 11:00 | 11 | 28,83 I    | 149,17218,5528,48 |       |
| 7 | PORT 25/12/2010 05:00 | 25/12/2010 23:00 | 18 | 47,10 I    | 220,74218,5547,64 |       |
| 7 | SORR 27/01/2011 19:00 | 28/01/2011 07:00 | 12 | 31,07 I    | 23 74,50 44,00    |       |
| 7 | SORR 16/02/2011 13:00 | 17/02/2011 11:00 | 22 | 286,31 II  | 200,91145,1633,59 |       |
| 7 | SORR 24/02/2011 00:00 | 24/02/2011 23:00 | 23 | 72,64 I    | 36 145,1631,92    |       |
| 7 | CAST 16/02/2011 14:00 | 17/02/2011 12:00 | 22 | 65,12 I    | 200,87184,1920,30 |       |
| 7 | SORR 03/05/2011 14:00 | 03/05/2011 23:00 | 9  | 36,41 I    | 218,15232,7939,56 |       |

---

|   |                       |                  |    |          |                   |
|---|-----------------------|------------------|----|----------|-------------------|
| 7 | SORR 04/05/2011 12:00 | 05/05/2011 12:00 | 24 | 64,58 I  | 108,86232,7951,69 |
| 7 | CAST 03/05/2011 18:00 | 04/05/2011 22:00 | 28 | 62,68 I  | 181,29242,0514,25 |
| 7 | SORR 02/06/2011 01:00 | 02/06/2011 21:00 | 20 | 95,63 I  | 148,74263,5425,78 |
| 7 | SORR 07/10/2011 08:00 | 08/10/2011 08:00 | 24 | 184,00I  | 132,46223,1130,68 |
| 7 | SORR 03/12/2011 18:00 | 04/12/2011 23:00 | 29 | 156,96I  | 190,34235,2932,66 |
| 7 | SORR 05/01/2012 12:00 | 05/01/2012 23:00 | 11 | 109,82I  | 234,40264,8124,61 |
| 7 | SORR 07/01/2012 00:00 | 07/01/2012 12:00 | 12 | 41,49 I  | 159,89264,8136,82 |
| 7 | SORR 07/01/2012 21:00 | 08/01/2012 11:00 | 14 | 55,75 I  | 44,21 264,8120,48 |
| 7 | CAST 05/01/2012 12:00 | 06/01/2012 23:00 | 35 | 209,81I  | 228,40257,9525,08 |
| 7 | SORR 19/02/2012 03:00 | 19/02/2012 11:00 | 8  | 41,84 I  | 194,06241,7834,81 |
| 7 | SORR 07/04/2012 12:00 | 08/04/2012 23:00 | 35 | 324,13II | 202,10243,7327,70 |
| 7 | SORR 11/04/2012 16:00 | 12/04/2012 11:00 | 19 | 154,72I  | 226,87243,7326,62 |
| 7 | SORR 14/04/2012 01:00 | 15/04/2012 13:00 | 36 | 391,46II | 203,45243,7327,92 |
| 7 | SORR 15/04/2012 20:00 | 16/04/2012 23:00 | 27 | 107,75I  | 140,24243,7336,19 |
| 7 | SORR 18/04/2012 04:00 | 21/04/2012 11:00 | 79 | 813 IV   | 211,06243,7328,95 |
| 7 | SORR 24/04/2012 21:00 | 26/04/2012 06:00 | 33 | 153,22I  | 165,75243,7324,45 |
| 7 | CAST 07/04/2012 12:00 | 07/04/2012 23:00 | 11 | 50,37 I  | 249,36247,9421,01 |
| 7 | CAST 11/04/2012 17:00 | 12/04/2012 20:00 | 27 | 93,67 I  | 216,04247,9418,73 |
| 7 | CAST 14/04/2012 09:00 | 16/04/2012 23:00 | 62 | 381,29II | 183,77247,9421,58 |
| 7 | CAST 18/04/2012 07:00 | 21/04/2012 11:00 | 76 | 426,70II | 213,00247,9418,59 |
| 7 | CAST 25/04/2012 00:00 | 25/04/2012 23:00 | 23 | 72,81 I  | 197,12247,9418,68 |
| 7 | PORT 09/04/2012 00:00 | 09/04/2012 10:00 | 10 | 31,63 I  | 31,75 233,6429,91 |
| 7 | PORT 14/04/2012 00:00 | 14/04/2012 11:00 | 11 | 39,69 I  | 149,30233,6432,63 |
| 7 | PORT 18/04/2012 16:00 | 20/04/2012 23:00 | 55 | 114,94I  | 215,88233,6438,52 |
| 7 | SORR 07/05/2012 00:00 | 09/05/2012 23:00 | 71 | 280,69II | 176,24252,1826,57 |

---

|   |                       |                  |    |             |                   |
|---|-----------------------|------------------|----|-------------|-------------------|
| 7 | CAST 07/05/2012 08:00 | 08/05/2012 17:00 | 33 | 89,30 I     | 187,44246,6719,46 |
| 7 | SORR 21/05/2012 11:00 | 25/05/2012 11:00 | 96 | 556,80III   | 176,31238,4727,89 |
| 7 | CAST 21/05/2012 20:00 | 24/05/2012 11:00 | 63 | 385,64II    | 178,91241,5415,79 |
| 7 | PORT 22/05/2012 02:00 | 23/05/2012 18:00 | 40 | 108,31I     | 179,42234,7533,77 |
| 7 | SORR 05/06/2012 02:00 | 05/06/2012 23:00 | 21 | 111,32I     | 179,69250,4120,94 |
| 7 | SORR 31/08/2012 21:00 | 01/09/2012 15:00 | 18 | 99,15 I     | 274,53243,9721,51 |
| 7 | SORR 04/09/2012 13:00 | 06/09/2012 21:00 | 56 | 397,04II    | 174,97243,9730,46 |
| 7 | CAST 05/09/2012 23:00 | 06/09/2012 11:00 | 12 | 81,96 I     | 233,42242,8918,53 |
| 7 | PORT 04/09/2012 13:00 | 04/09/2012 22:00 | 9  | 24,03 I     | 158,93226,7133,06 |
| 7 | SORR 01/10/2012 20:00 | 03/10/2012 23:00 | 51 | 221,31I     | 224,76250,1726,98 |
| 7 | CAST 02/10/2012 12:00 | 03/10/2012 12:00 | 24 | 80,48 I     | 239,27258,7018,01 |
| 7 | SORR 08/10/2012 15:00 | 10/10/2012 04:00 | 37 | 88,99 I     | 166,07248,9830,39 |
| 7 | SORR 10/10/2012 12:00 | 11/10/2012 15:00 | 27 | 117,01I     | 142,73248,9828,35 |
| 7 | SORR 15/10/2012 05:00 | 17/10/2012 11:00 | 54 | 312,02II    | 171,63246,9529,63 |
| 7 | CAST 16/10/2012 00:00 | 16/10/2012 23:00 | 23 | 117,33I     | 231,08253,3222,18 |
| 7 | SORR 27/10/2012 00:00 | 29/10/2012 23:00 | 71 | 1,00E+03 IV | 224,20236,1131,18 |
| 7 | CAST 27/10/2012 14:00 | 28/10/2012 23:00 | 33 | 233,94I     | 264,37241,0019,38 |
| 7 | CAST 29/10/2012 14:00 | 29/10/2012 23:00 | 9  | 31,30 I     | 153,18241,0016,45 |
| 7 | PORT 26/10/2012 22:00 | 27/10/2012 23:00 | 25 | 80,72 I     | 213,22224,2625,38 |
| 7 | PORT 29/10/2012 05:00 | 29/10/2012 23:00 | 18 | 76,91 I     | 162,20224,2639,03 |
| 7 | SORR 28/11/2012 13:00 | 30/11/2012 11:00 | 46 | 1,18E+03 IV | 209,17220,9032,17 |
| 7 | SORR 01/12/2012 05:00 | 01/12/2012 11:00 | 6  | 31,49 I     | NaN 220,9041,37   |
| 7 | CAST 28/11/2012 17:00 | 30/11/2012 11:00 | 42 | 963,11IV    | 205,34228,8119,32 |
| 7 | PORT 28/11/2012 02:00 | 30/11/2012 11:00 | 57 | 374,97III   | 185,06209,2326,40 |
| 7 | SORR 14/12/2012 16:00 | 15/12/2012 23:00 | 31 | 125,04I     | NaN 251,0735,98   |



|   |                       |                  |    |           |                   |
|---|-----------------------|------------------|----|-----------|-------------------|
| 7 | SORR 16/12/2012 12:00 | 19/12/2012 17:00 | 77 | 501,62III | 99,80 251,0728,27 |
| 7 | CAST 15/12/2012 12:00 | 16/12/2012 11:00 | 23 | 59,70 I   | NaN 247,2423,11   |
| 7 | CAST 17/12/2012 09:00 | 19/12/2012 11:00 | 50 | 373,12II  | 105,24247,2414,44 |
| 7 | PORT 15/12/2012 11:00 | 16/12/2012 08:00 | 21 | 69,10 I   | NaN 229 34,29     |
| 7 | SORR 27/12/2012 00:00 | 27/12/2012 23:00 | 23 | 85,95 I   | 214,08264,0529,28 |
| 7 | SORR 28/12/2012 13:00 | 29/12/2012 08:00 | 19 | 61,79 I   | 48,12 264,0536,68 |

**Figure S1.** Density energy spectra evolution (hours with higher value of density energy) during the first event (4 Dec 2008– 7 Dec 2008) for SORR (first panel), CAST (second panel) and PORT (third panel).

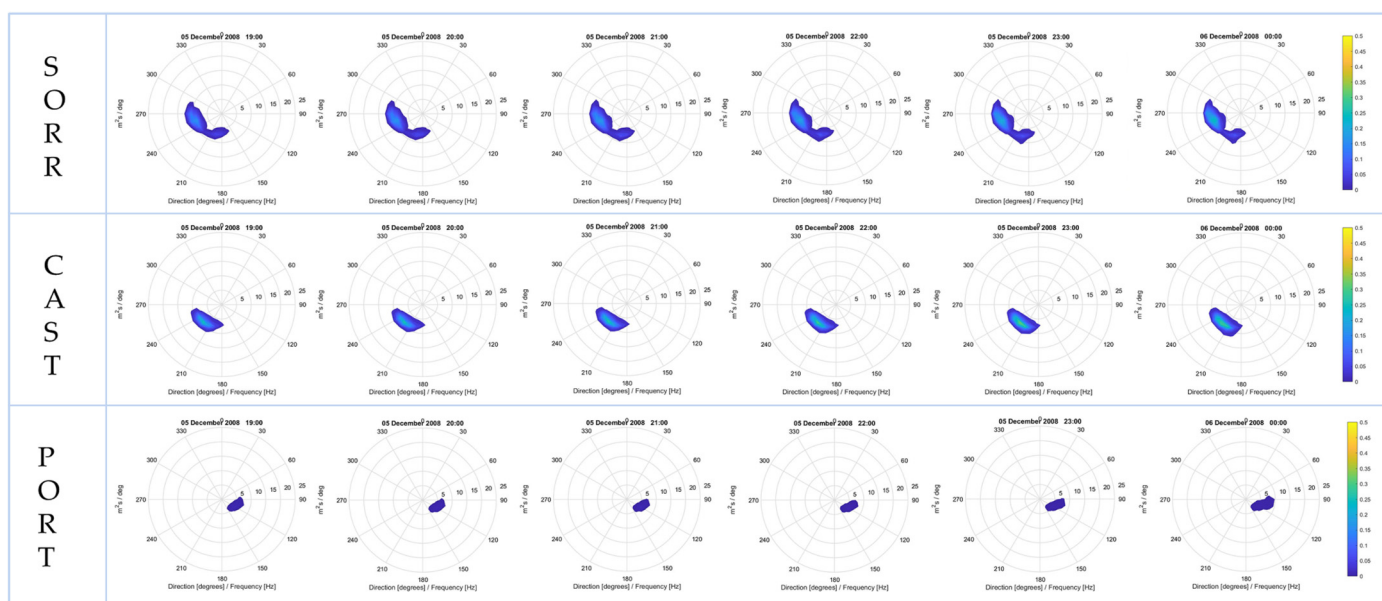

**Figure S2.** Density energy spectra (hours with higher value of density energy) during the second event (1 Jan 2009 - 3 Jan 2009) for SORR (first panel), CAST (second panel) and PORT (third panel).

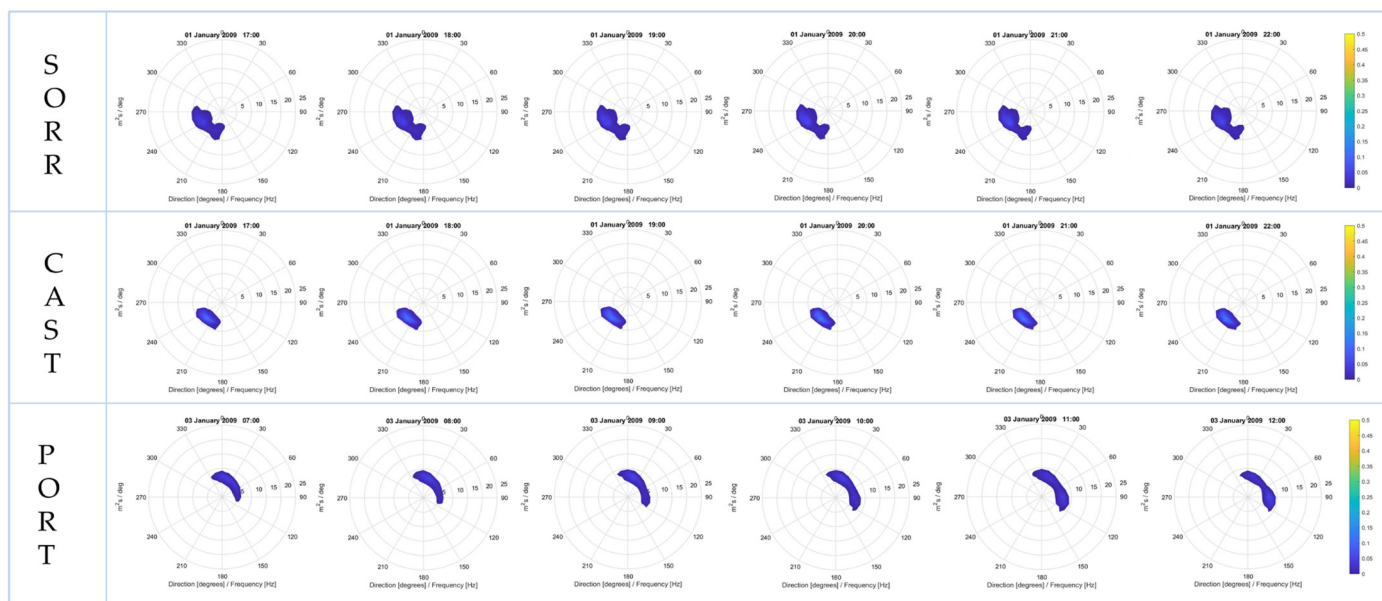

**Figure S3.** Density energy spectra (hours with higher value of density energy) during the third event (8 Nov 2010 - 10 Nov 2010) for SORR (first panel), CAST (second panel) and PORT (third panel).

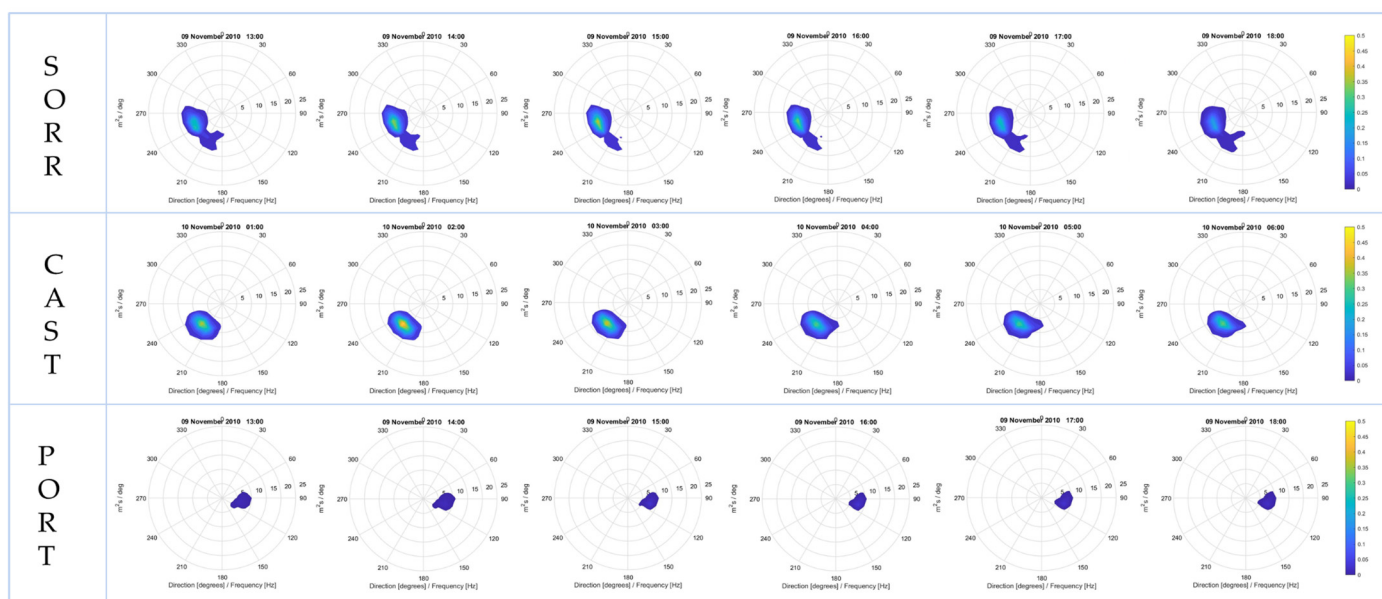

**Figure S4.** Density energy spectra (hours with higher value of density energy) during the third event (28 Nov 2012 - 30 Nov 2012) for SORR (first panel), CAST (second panel) and PORT (third panel).

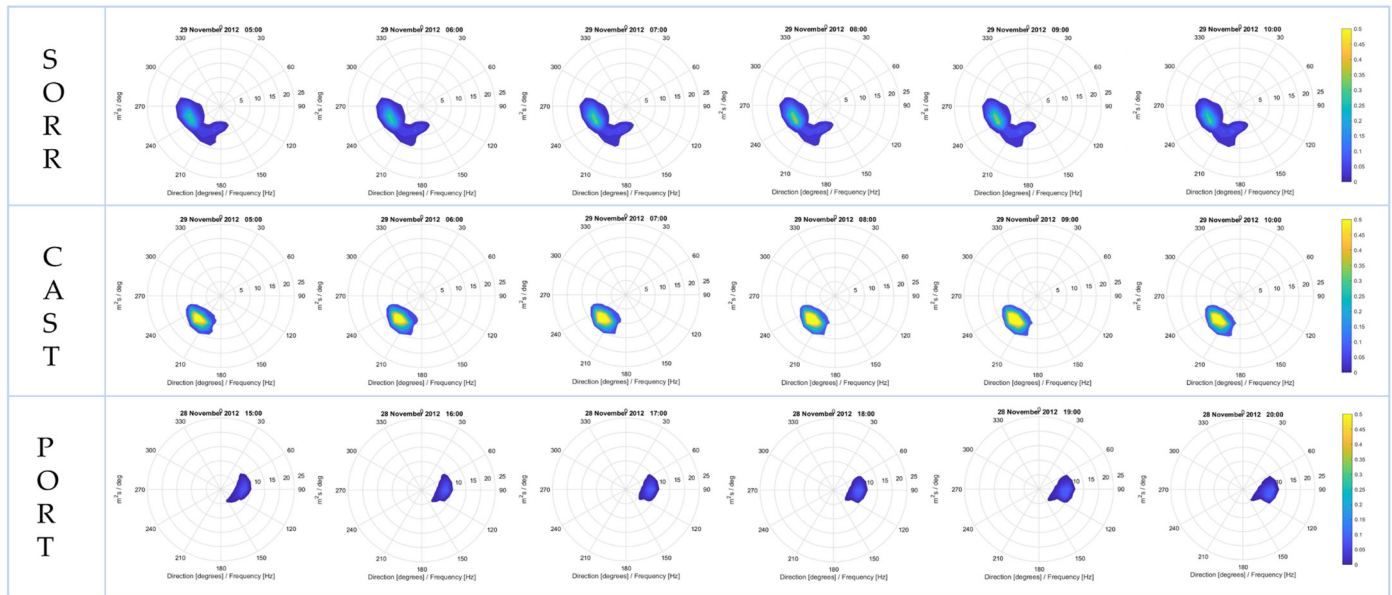

Supplement: s1 [file s1]
